# Supplementary material for: Rice Straw as Green Waste in a HTiO2@AC/SiO2 Nanocomposite Synthesized as an Adsorbent and Photocatalytic Material for Chlorpyrifos Removal from Aqueous Solution
Source: MDPI journal article supplement (doi:10.3390/catal12070714), 2022-06-29
Supplement: s1 [file s1]

## **Supplementary**

$$D = \frac{K\lambda}{\beta \cos \theta} \quad (1)$$

where  $\lambda$  (X-ray wavelength) = 0.15418 nm,  $\theta$  = Bragg's angle ( $2\theta = 25.15$ ),  $\beta$  = full width and half maxima.  $D$  = Crystallite size,  $B$  = the line width at half-maximum height after the subtraction of equipment broadening, and  $K$  = Scherrer constant (0.089).

$$\frac{q_t}{q_e} = 6\left(\frac{D_1}{\pi a^2}\right)^{0.5} t^{0.5} + C \quad (3)$$

$A$  ( $\mu\text{m}$ ) is the average HTiO<sub>2</sub>@AC/SiO<sub>2</sub> radius, and  $D_1$  is the film diffusion coefficient ( $\mu\text{m}^2 \text{S}^{-1}$ ).
